# Supplementary material
Source: HighWire-hosted journal article supplement (https://jitc.bmj.com/content/11/2/e005527)
Supplement: inline-supplementary-material-1 [file inline-supplementary-material-1.pdf]

## Supplemental Fig 1

### Sorting strategy for mouse CD11b<sup>+</sup>Ly6G<sup>+</sup>Ly6C<sup>low</sup> cells and CD11b<sup>+</sup>Ly6G<sup>+</sup>Ly6C<sup>high</sup> cells

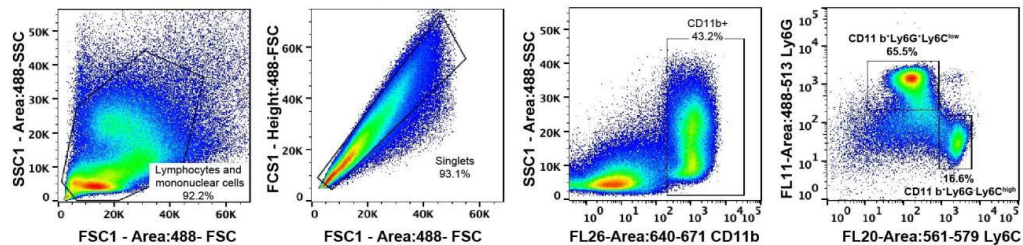

### Backtesting the efficiency of FACS sorting of mouse CD11b<sup>+</sup>Ly6G<sup>+</sup>Ly6C<sup>low</sup> cells

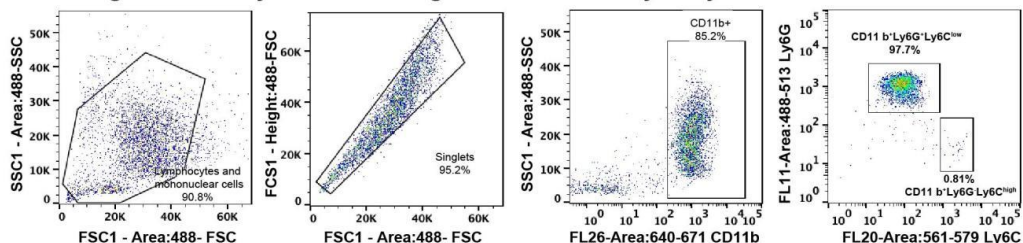

### Backtesting the efficiency of FACS sorting of mouse CD11b<sup>+</sup>Ly6G<sup>+</sup>Ly6C<sup>high</sup> cells

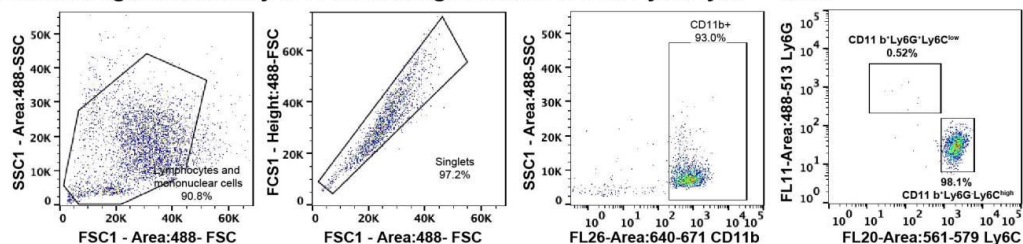

### Gating strategy of CD11b<sup>+</sup>Ly6G<sup>+</sup>Ly6C<sup>low</sup> and CD11b<sup>+</sup>Ly6G<sup>+</sup>Ly6C<sup>high</sup> cells

FACS strategy to sort CD11b<sup>+</sup>Ly6G<sup>+</sup>Ly6C<sup>low</sup> cells and CD11b<sup>+</sup>Ly6G<sup>+</sup>Ly6C<sup>high</sup> cells derived from mouse bone marrow. Firstly, using FSC-A and SSC-A physical conditions to gate the lymphocytes and mononuclear cells; Secondly, adhesion cells were removed with FSC-A and FSC-H or FSC-W to get the single cell; Thirdly, CD11b<sup>+</sup> cells were gated by anti-mouse CD11b-APC and SSC-A parameters; Finally, using anti-mouse Ly6G-FITC and anti-mouse Ly6C-PE parameters to gate the target cells, respectively. According to the FACS sorting strategy, the purity of CD11b<sup>+</sup>Ly6G<sup>+</sup>Ly6C<sup>low</sup> cells reached 97.7% and the CD11b<sup>+</sup>Ly6G<sup>+</sup>Ly6C<sup>high</sup> cells is 98.1%.

## Supplemental Fig 2

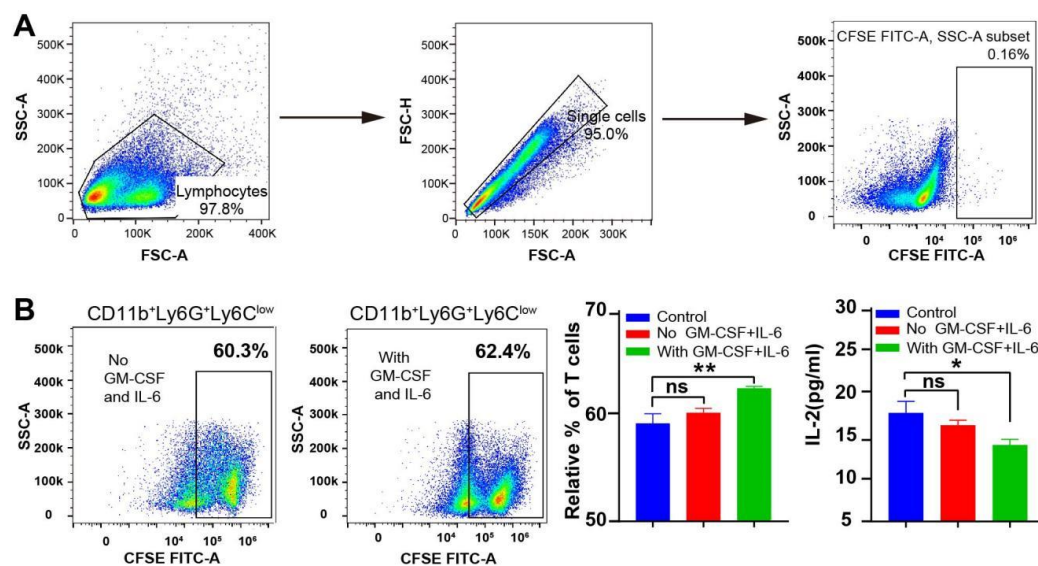Effect of BM-derived CD11b<sup>+</sup>Ly6G<sup>+</sup>Ly6C<sup>low</sup> cells on T cell proliferation

FCM analysis of the immunosuppressive ability of CD11b<sup>+</sup>Ly6G<sup>+</sup>Ly6C<sup>low</sup> cells. **A.** Setting strategy to analyze T cell proliferation. Firstly, using FSC-A and SSC-A physical conditions to gate the lymphocytes cells; Secondly, gating the single cells by FSC-A and FSC-H parameters; Finally, testing T cell with CFSE at FITC panel. **B.** Assessment of the immunosuppressive ability of BM-derived CD11b<sup>+</sup>Ly6G<sup>+</sup>Ly6C<sup>low</sup> cells. WT mice BM-derived CD11b<sup>+</sup>Ly6G<sup>+</sup>Ly6C<sup>low</sup> cells cocultured with activated CFSE-labeled T cells without mouse GM-CSF and IL-6 stimulation as a naive group, cocultured cells with GM-CSF and IL-6 stimulation as a stimulation group, only activated CFSE-labeled T cells as a control, respectively.  $n=3$ . \*  $P < 0.05$ , \*\*  $P < 0.01$ .

## Supplemental Fig 3

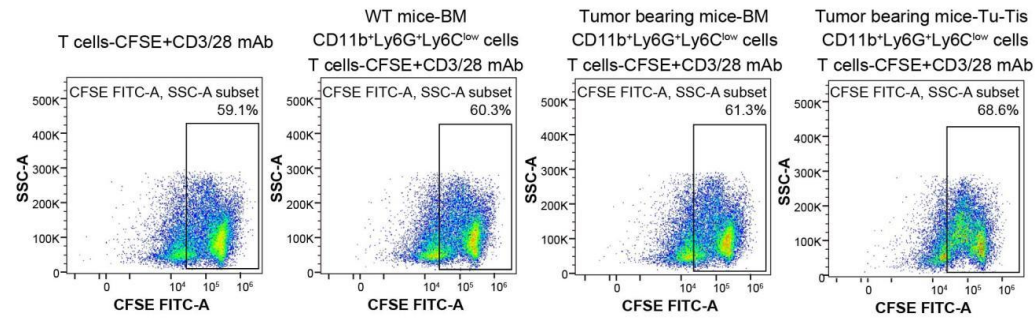

### BM-derived CD11b<sup>+</sup>Ly6G<sup>+</sup>Ly6C<sup>low</sup> cells from the tumor bearing mice suppress T cell proliferation

T cell proliferation were analyzed by FCM. We co-cultured activated CFSE-labelled T cells which were activated by anti-CD3 and anti-CD28 antibody with WT mouse BM-derived CD11b<sup>+</sup>Ly6G<sup>+</sup>Ly6C<sup>low</sup> cells, tumor bearing mouse BM-derived CD11b<sup>+</sup>Ly6G<sup>+</sup>Ly6C<sup>low</sup> cells and tumor tissue derived CD11b<sup>+</sup>Ly6G<sup>+</sup>Ly6C<sup>low</sup> cells for 96 h, respectively. After that, the FITC signal intensity of T cells was detected by FCM.

## Supplemental Fig 4

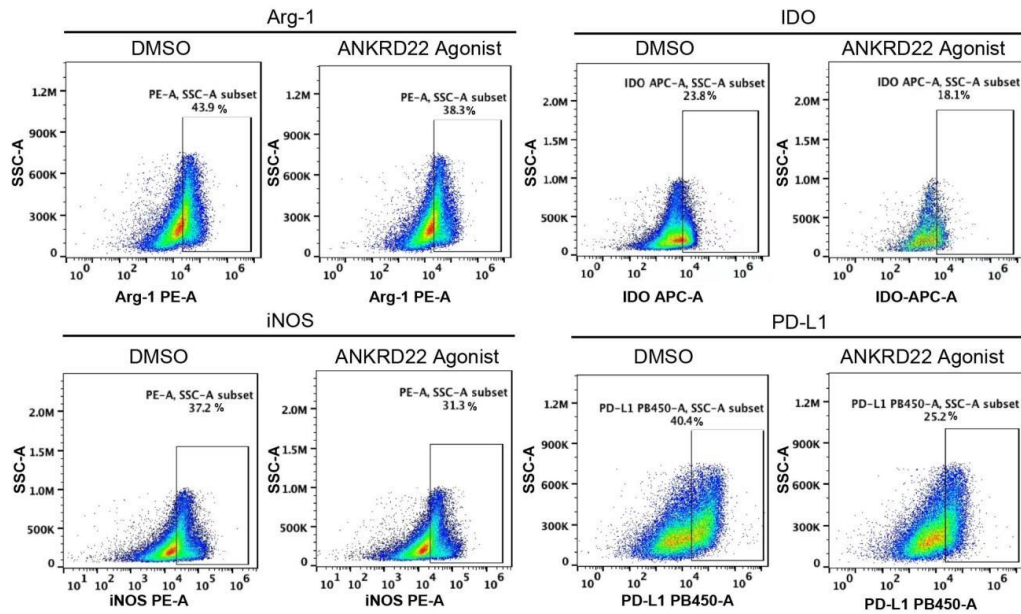**Effect of ANKRD22 agonist on immunosuppressive ability of PMN-MDSCs**

PMN-MDSCs were treated with 1.0  $\mu\text{M}$  ANKRD22 agonist for 72 h *in vitro*, and FCM showed the levels of Arg-1, iNOS, IDO and PD-L1 were reduced in PMN-MDSCs.

**Supplemental Fig 5**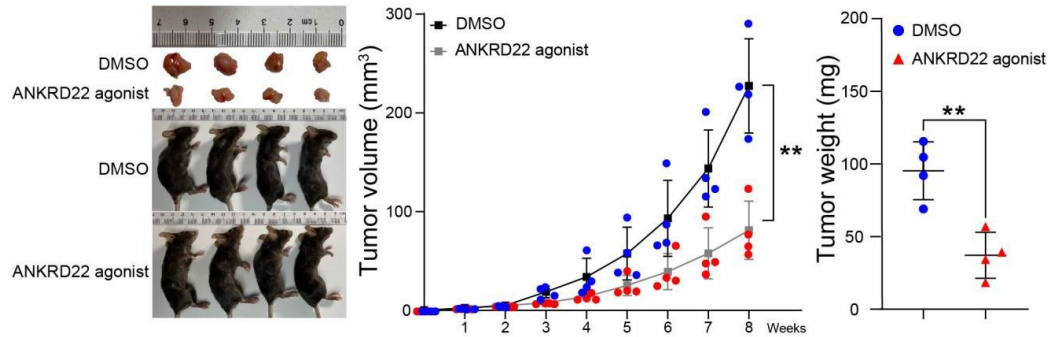**The immunosuppressive ability of PMN-MDSCs was reversed****in transplanted tumor mouse models with treatment of an ANKRD22 agonist**

PMN-MDSCs treated with 1.0  $\mu$ M ANKRD22 agonist for 72 h and mouse ID8 ovarian cancer cells were mixed and suspended in Matrigel for subcutaneous tumorigenesis in C57BL/6 mice. Tumor diameters were measured with a Vernier caliper. n =4. \*\* P <0.01.

Supplementary Table 1

## The clinical characteristics of patients

| Parameters                         | Ovarian<br>Cancer<br>Patients | Non-Ovarian Cancer<br>Patients |
|------------------------------------|-------------------------------|--------------------------------|
| Total number of cases              | 20                            | 7                              |
| Age (years)                        | 58(42-74)                     | 48(30-64)                      |
| Median (range)                     |                               |                                |
| <b>Menopausal status</b>           |                               |                                |
| Pre-                               | 9                             | 5                              |
| Post-                              | 11                            | 2                              |
| <b>Ovarian involvement</b>         |                               |                                |
| Unilateral                         | 15                            |                                |
| Bilateral                          | 4                             |                                |
| <b>Tumor size</b>                  |                               |                                |
| <10 cm                             | 9                             |                                |
| ≥10 cm                             | 11                            |                                |
| <b>FIGO stage</b>                  |                               |                                |
| I-III                              | 7                             |                                |
| IV                                 | 13                            |                                |
| <b>Residual tumor (TR)</b>         |                               |                                |
| TR= 0 cm                           | 5                             |                                |
| TR> 0 cm                           | 15                            |                                |
| <b>Presence of ascites</b>         |                               |                                |
| Yes                                | 9                             |                                |
| No                                 | 11                            |                                |
| <b>Lymph nodes</b>                 |                               |                                |
| Negative                           | 15                            |                                |
| Positive                           | 5                             |                                |
| <b>Platinum-based chemotherapy</b> |                               |                                |
| Yes                                | 19                            |                                |
| No                                 | 1                             |                                |
| <b>Histological type</b>           |                               |                                |
| Non-epithelial                     | 9                             |                                |
| Epithelial                         | 11                            |                                |
| <b>Grade</b>                       |                               |                                |
| Low                                | 13                            |                                |
| High                               | 7                             |                                |
| <b>NLR</b>                         |                               |                                |
| <2.14                              | 7                             |                                |
| ≥2.14                              | 13                            |                                |
| <b>MLR</b>                         |                               |                                |

---

|            |         |    |
|------------|---------|----|
|            | <0.24   | 5  |
|            | ≥0.24   | 15 |
| <b>PLR</b> |         |    |
|            | <146.11 | 5  |
|            | ≥146.11 | 15 |

---
